# Supplementary material for: Na4Sn4(C2O4)3F6 and NaSnC2O4F·H2O: two tin(ii) fluoride oxalates display large birefringence
Source: Royal Society of Chemistry journal article supplement (doi:10.1039/d3dt04286c), 2024-01-01
Supplement: d3dt04286c1.pdf [file d3dt04286c1.pdf]

Electronic Supporting Information

**Na<sub>4</sub>Sn<sub>4</sub>(C<sub>2</sub>O<sub>4</sub>)<sub>3</sub>F<sub>6</sub> and NaSnC<sub>2</sub>O<sub>4</sub>F·H<sub>2</sub>O: two tin(II) fluoride oxalates display large birefringence**

Liyang Ren,<sup>a</sup> Zeqiao Yin,<sup>a</sup> Shiyi Wang,<sup>a</sup> Zhengyan Lin,<sup>a</sup> Liling Cao,<sup>\*a</sup> Xuehua Dong,<sup>a</sup> Ling Huang,<sup>a</sup> Yuqiao Zhou,<sup>b</sup> Daojiang Gao<sup>a</sup> and Guohong Zou<sup>\*b</sup>

a. College of Chemistry and Materials Science, Sichuan Normal University, Chengdu, 610066, P. R. China.

b. College of Chemistry, Sichuan University, Chengdu, 610065, P. R. China.

E-mail: llcao21@163.com; zough@scu.edu.cn

## Table of contents

| Sections | Titles                                                                                                                                                                                                                                                                               | Pages |
|----------|--------------------------------------------------------------------------------------------------------------------------------------------------------------------------------------------------------------------------------------------------------------------------------------|-------|
| Table S1 | Atomic coordinates ( $\times 10^4$ ) and equivalent isotropic displacement parameters ( $\text{\AA}^2 \times 10^3$ ) for $\text{Na}_4\text{Sn}_4(\text{C}_2\text{O}_4)_3\text{F}_6$ . $U_{(\text{eq})}$ is defined as one third of the trace of the orthogonalized $U_{ij}$ tensor.  | S3    |
| Table S2 | Atomic coordinates ( $\times 10^4$ ) and equivalent isotropic displacement parameters ( $\text{\AA}^2 \times 10^3$ ) for $\text{NaSnC}_2\text{O}_4\text{F} \cdot \text{H}_2\text{O}$ . $U_{(\text{eq})}$ is defined as one third of the trace of the orthogonalized $U_{ij}$ tensor. | S4    |
| Table S3 | Selected bond lengths [ $\text{\AA}$ ] and angles [ $^\circ$ ] for $\text{Na}_4\text{Sn}_4(\text{C}_2\text{O}_4)_3\text{F}_6$ .                                                                                                                                                      | S5    |
| Table S4 | Selected bond lengths [ $\text{\AA}$ ] and angles [ $^\circ$ ] for $\text{NaSnC}_2\text{O}_4\text{F} \cdot \text{H}_2\text{O}$ .                                                                                                                                                     | S6    |
| Fig. S1  | Powder XRD patterns of $\text{Na}_4\text{Sn}_4(\text{C}_2\text{O}_4)_3\text{F}_6$ and $\text{NaSnC}_2\text{O}_4\text{F} \cdot \text{H}_2\text{O}$ .                                                                                                                                  | S7    |
| Fig. S2  | The TG curves of $\text{Na}_4\text{Sn}_4(\text{C}_2\text{O}_4)_3\text{F}_6$ and $\text{NaSnC}_2\text{O}_4\text{F} \cdot \text{H}_2\text{O}$ .                                                                                                                                        | S7    |
| Fig. S3  | XRD patterns for compounds $\text{Na}_4\text{Sn}_4(\text{C}_2\text{O}_4)_3\text{F}_6$ and $\text{NaSnC}_2\text{O}_4\text{F} \cdot \text{H}_2\text{O}$ after melting.                                                                                                                 | S7    |
| Fig. S4  | IR spectra of $\text{Na}_4\text{Sn}_4(\text{C}_2\text{O}_4)_3\text{F}_6$ and $\text{NaSnC}_2\text{O}_4\text{F} \cdot \text{H}_2\text{O}$ .                                                                                                                                           | S8    |
| Fig. S5  | The UV-vis-NIR diffuse reflectance spectra and band gaps of $\text{Na}_4\text{Sn}_4(\text{C}_2\text{O}_4)_3\text{F}_6$ and $\text{NaSnC}_2\text{O}_4\text{F} \cdot \text{H}_2\text{O}$ .                                                                                             | S8    |
| Fig. S6  | Birefringence measurement photos of $\text{Na}_4\text{Sn}_4(\text{C}_2\text{O}_4)_3\text{F}_6$ and $\text{NaSnC}_2\text{O}_4\text{F} \cdot \text{H}_2\text{O}$ .                                                                                                                     | S8    |
| Fig. S7  | Calculated band gaps of $\text{Na}_4\text{Sn}_4(\text{C}_2\text{O}_4)_3\text{F}_6$ and $\text{NaSnC}_2\text{O}_4\text{F} \cdot \text{H}_2\text{O}$ .                                                                                                                                 | S9    |

**Table S1.** Atomic coordinates ( $\times 10^4$ ) and equivalent isotropic displacement parameters ( $\text{\AA}^2 \times 10^3$ ) for  $\text{Na}_4\text{Sn}_4(\text{C}_2\text{O}_4)_3\text{F}_6$ .  $U_{(\text{eq})}$  is defined as one third of the trace of the orthogonalized  $U_{ij}$  tensor.

| atom | x         | y          | z          | $U_{\text{eq}}(\text{\AA}^2)$ |
|------|-----------|------------|------------|-------------------------------|
| Sn1  | 8305.4(3) | 11381.0(2) | 1343.7(2)  | 18.54(7)                      |
| Sn2  | 8318.5(3) | 5688.7(2)  | 8202.9(2)  | 20.15(7)                      |
| Na1  | 8604(2)   | 7352.8(14) | 3758.5(14) | 25.9(3)                       |
| Na2  | 12912(2)  | 9569.1(15) | 4212.6(15) | 29.6(3)                       |
| F1   | 6385(3)   | 10415(2)   | 3438.6(19) | 30.5(4)                       |
| F2   | 10601(3)  | 9563(2)    | 2571(2)    | 29.6(4)                       |
| F3   | 8686(3)   | 7646(2)    | 6176(2)    | 33.5(4)                       |
| O1   | 5403(3)   | 2967(2)    | 6078(3)    | 23.2(4)                       |
| O2   | 7879(3)   | 4206(2)    | 6773(3)    | 25.1(4)                       |
| O3   | 7533(3)   | 9240(2)    | 834(2)     | 22.6(4)                       |
| O4   | 2013(3)   | 4769(3)    | 7154(3)    | 25.9(4)                       |
| O5   | 4565(4)   | 5915(3)    | 7896(3)    | 28.5(5)                       |
| O6   | 5471(4)   | 8154(3)    | -329(3)    | 33.1(5)                       |
| C1   | 5890(5)   | 3931(3)    | 6663(3)    | 18.1(5)                       |
| C2   | 5853(5)   | 9253(3)    | 139(3)     | 19.1(6)                       |
| C3   | 3971(5)   | 4971(3)    | 7289(3)    | 18.8(5)                       |

**Table S2.** Atomic coordinates ( $\times 10^4$ ) and equivalent isotropic displacement parameters ( $\text{\AA}^2 \times 10^3$ ) for  $\text{NaSnC}_2\text{O}_4\text{F} \cdot \text{H}_2\text{O}$ .  $U_{\text{eq}}$  is defined as one third of the trace of the orthogonalized  $U_{ij}$  tensor.

| atom | x          | y         | z         | $U_{\text{eq}}(\text{\AA}^2)$ |
|------|------------|-----------|-----------|-------------------------------|
| Sn1  | 10808.2(4) | 7335.9(3) | 9565.1(3) | 23.32(10)                     |
| Na1  | 9074(3)    | 2384(2)   | 5096(2)   | 28.9(3)                       |
| F1   | 9720(4)    | 4253(3)   | 8203(3)   | 28.1(5)                       |
| O1   | 8639(5)    | 7385(4)   | 6887(3)   | 25.2(5)                       |
| O2   | 4999(5)    | 7417(4)   | 5116(4)   | 29.9(6)                       |
| O3   | 6842(5)    | 7004(4)   | 9355(3)   | 29.7(6)                       |
| O4   | 3099(5)    | 6682(5)   | 7450(4)   | 34.1(6)                       |
| O5   | 7518(6)    | -1233(5)  | 3303(4)   | 33.3(7)                       |
| C1   | 5316(7)    | 6951(5)   | 7879(5)   | 23.9(7)                       |
| C2   | 6369(6)    | 7276(5)   | 6482(5)   | 21.2(7)                       |

**Table S3.** Selected bond lengths [Å] and angles [°] for Na<sub>4</sub>Sn<sub>4</sub>(C<sub>2</sub>O<sub>4</sub>)<sub>3</sub>F<sub>6</sub>.

|                                        |            |                                        |            |
|----------------------------------------|------------|----------------------------------------|------------|
| Sn1-F1                                 | 2.0439(17) | Na1-O4 <sup>v</sup>                    | 2.381(2)   |
| Sn1-F2                                 | 2.0989(16) | Na2-F1 <sup>ii</sup>                   | 2.243(2)   |
| Sn1-O3                                 | 2.2092(19) | Na2-F1 <sup>iv</sup>                   | 2.251(2)   |
| Sn1-O6 <sup>i</sup>                    | 2.521(2)   | Na2-F2                                 | 2.194(2)   |
| Sn2-F3                                 | 2.0473(17) | Na2-F3 <sup>iv</sup>                   | 2.447(2)   |
| Sn2-O2                                 | 2.204(2)   | Na2-O1 <sup>vi</sup>                   | 2.424(2)   |
| Sn2-O4 <sup>ii</sup>                   | 2.454(2)   | O1-C1                                  | 1.232(3)   |
| Sn2-O5                                 | 2.301(2)   | O2-C1                                  | 1.278(3)   |
| Na1-F1                                 | 2.800(2)   | O3-C2                                  | 1.271(3)   |
| Na1-F2                                 | 2.266(2)   | O4-C3                                  | 1.246(3)   |
| Na1-F3                                 | 2.318(2)   | O5-C3                                  | 1.258(3)   |
| Na1-O1 <sup>v</sup>                    | 2.446(2)   | O6-C2                                  | 1.243(4)   |
| Na1-O2 <sup>vi</sup>                   | 2.466(2)   | C1-C3                                  | 1.555(4)   |
| Na1-O3                                 | 2.731(2)   | C2-C2 <sup>i</sup>                     | 1.539(5)   |
| F1-Sn1-F2                              | 79.55(8)   | O1 <sup>vi</sup> -Na2-F3 <sup>iv</sup> | 166.39(9)  |
| F2-Sn1-O3                              | 77.87(7)   | Sn1-F1-Na1                             | 89.82(7)   |
| F2-Sn1-O6 <sup>i</sup>                 | 143.06(7)  | Sn1-F1-Na2 <sup>iii</sup>              | 136.43(9)  |
| O3-Sn1-O6 <sup>i</sup>                 | 69.12(7)   | Na2-F2-Na1                             | 107.07(8)  |
| F3-Sn2-O2                              | 88.70(8)   | Na2 <sup>vi</sup> -O1-Na1 <sup>v</sup> | 101.91(8)  |
| O5-Sn2-O4 <sup>ii</sup>                | 141.72(7)  | C1-O1-Na1 <sup>v</sup>                 | 116.08(18) |
| F2-Na1-F1                              | 62.06(7)   | C1-O1-Na2 <sup>vi</sup>                | 135.79(18) |
| F2-Na1-O2 <sup>vi</sup>                | 85.04(8)   | Sn2-O2-Na1 <sup>vi</sup>               | 111.88(9)  |
| F3-Na1-F1                              | 75.98(6)   | C1-O2-Sn2                              | 118.76(18) |
| F3-Na1-O3                              | 137.89(8)  | Sn1-O3-Na1                             | 88.30(7)   |
| O2 <sup>vi</sup> -Na1-F1               | 147.07(8)  | C2-O3-Sn1                              | 122.48(17) |
| O2 <sup>vi</sup> -Na1-O3               | 103.84(8)  | C3-O4-Sn2 <sup>iii</sup>               | 133.04(19) |
| O3-Na1-F1                              | 62.62(6)   | C2-O6-Sn1 <sup>i</sup>                 | 112.68(18) |
| O4 <sup>v</sup> -Na1-O2 <sup>vi</sup>  | 67.60(7)   | O1-C1-C3                               | 118.9(2)   |
| O4 <sup>v</sup> -Na1-O3                | 81.90(7)   | O2-C1-C3                               | 115.3(2)   |
| F1 <sup>iv</sup> -Na2-O1 <sup>vi</sup> | 107.59(8)  | O6-C2-O3                               | 125.2(3)   |
| F2-Na2- F1 <sup>iv</sup>               | 151.79(10) | O4-C3-O5                               | 126.9(3)   |
| F2-Na2-F1 <sup>ii</sup>                | 123.35(9)  |                                        |            |

Symmetry codes:

(i) 1-x, 2-y, -z; (ii) 1+x, +y, +z; (iii) -1+x, +y, +z; (iv) 2-x, 2-y, 1-z; (v) 1-x, 1-y, 1-z; (vi) 2-x, 1-y, 1-z; (vii) 3-x, 2-y, 1-z.

**Table S4.** Selected bond lengths [Å] and angles [°] for NaSnC<sub>2</sub>O<sub>4</sub>F·H<sub>2</sub>O.

|                                         |            |                                        |            |
|-----------------------------------------|------------|----------------------------------------|------------|
| Sn1-F1                                  | 2.020(2)   | Na1-O5                                 | 2.390(3)   |
| Sn1-O1                                  | 2.215(3)   | O1-Na1 <sup>ii</sup>                   | 2.479(3)   |
| Sn1-O3                                  | 2.304(3)   | O1-C2                                  | 1.280(4)   |
| Sn1-O4 <sup>i</sup>                     | 2.496(2)   | O2-C2                                  | 1.223(4)   |
| Na1-F1                                  | 2.318(2)   | O3-C1                                  | 1.266(5)   |
| Na1-O2 <sup>iv</sup>                    | 2.416(3)   | O4-C1                                  | 1.234(5)   |
| Na1-O4 <sup>iv</sup>                    | 2.480(3)   | C1-C2                                  | 1.551(5)   |
| F1-Sn1-O1                               | 86.59(9)   | C2-O1-Sn1                              | 119.0(2)   |
| F1-Sn1-O4 <sup>i</sup>                  | 78.50(9)   | C2-O1-Na1 <sup>iii</sup>               | 125.8(2)   |
| O1-Sn1-O4 <sup>i</sup>                  | 69.91(9)   | Na1 <sup>iv</sup> -O4-Sn1 <sup>v</sup> | 105.65(11) |
| O3-Sn1-O4 <sup>i</sup>                  | 138.82(9)  | C1-O4-Sn1 <sup>v</sup>                 | 128.1(2)   |
| F1-Na1-O1 <sup>iii</sup>                | 133.55(11) | C1-O4-Na1 <sup>iv</sup>                | 116.2(2)   |
| F1-Na1-O2 <sup>iv</sup>                 | 78.67(10)  | Na1-O5-Na1 <sup>ii</sup>               | 99.52(12)  |
| O1 <sup>iii</sup> -Na1-O4 <sup>iv</sup> | 66.23(9)   | O3-C1-C2                               | 116.0(3)   |
| O1 <sup>iii</sup> -Na1-O5 <sup>ii</sup> | 85.60(11)  | O4-C1-O3                               | 126.8(3)   |
| O2 <sup>iv</sup> -Na1-O1 <sup>iii</sup> | 132.82(10) | O4-C1-C2                               | 117.2(3)   |
| O4 <sup>iv</sup> -Na1-O5 <sup>ii</sup>  | 151.56(12) | O1-C2-C1                               | 115.9(3)   |
| O5-Na1-O4 <sup>iv</sup>                 | 95.66(12)  | O2-C2-O1                               | 125.8(3)   |
| Sn1-F1-Na1                              | 125.40(10) | O2-C2-C1                               | 118.3(3)   |

Symmetry codes:

- (i) 1+x, +y, +z; 3/2-z; (ii) 2-x, 1-y, 1-z; (iii) 2-x, -y, 1-z; (iv) 1-x, 1-y, 1-z; (v) -1+x, +y, +z.  
(i) 1+x, +y, +z; (ii) 2-x, -y, 1-z; (iii) 2-x, 1-y, 1-z; (iv) 1-x, 1-y, 1-z; (v) -1+x, +y, +z.

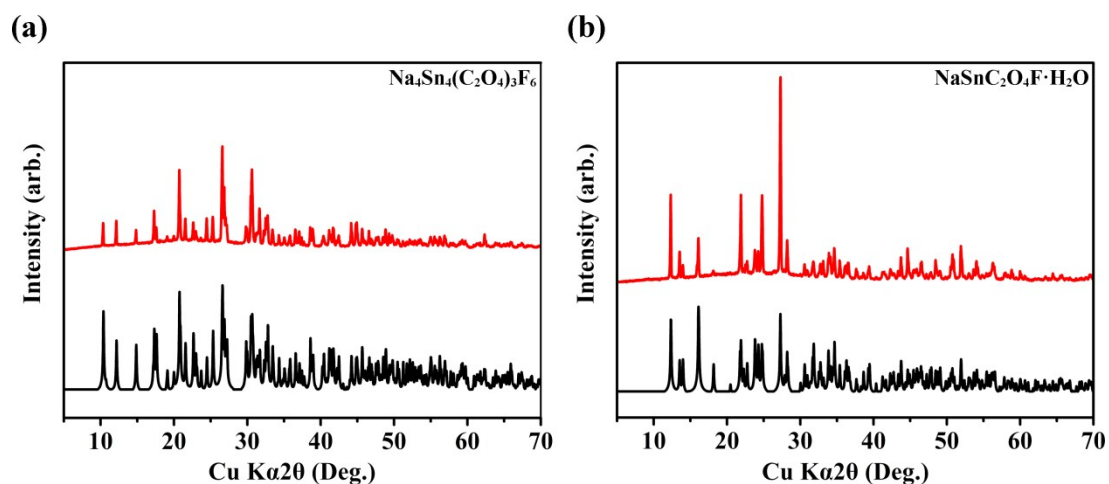

**Fig. S1** Powder XRD patterns of (a)  $\text{Na}_4\text{Sn}_4(\text{C}_2\text{O}_4)_3\text{F}_6$  and (b)  $\text{NaSnC}_2\text{O}_4\text{F}\cdot\text{H}_2\text{O}$ . The red curves are patterns of samples, the black are the simulated ones.

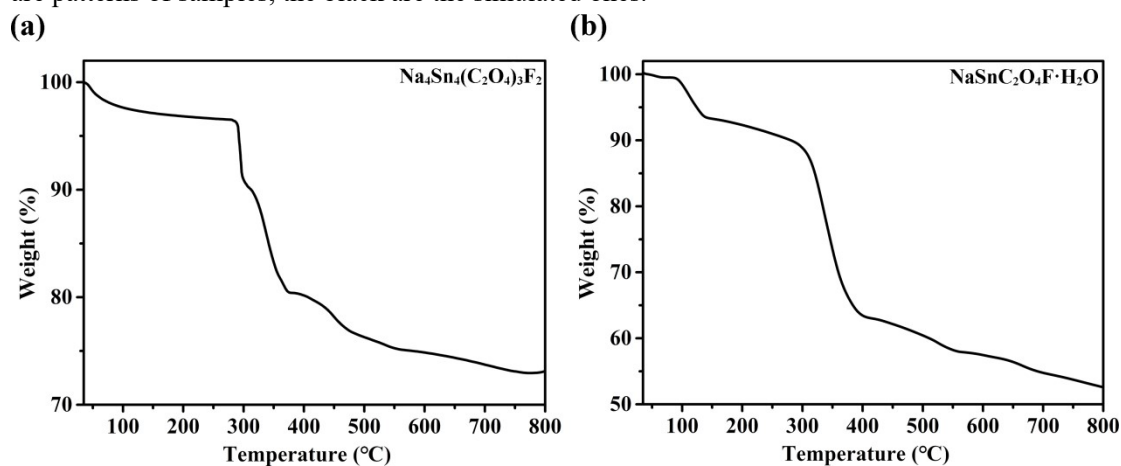

**Fig. S2** The TG curves of (a)  $\text{Na}_4\text{Sn}_4(\text{C}_2\text{O}_4)_3\text{F}_6$  and (b)  $\text{NaSnC}_2\text{O}_4\text{F}\cdot\text{H}_2\text{O}$ .

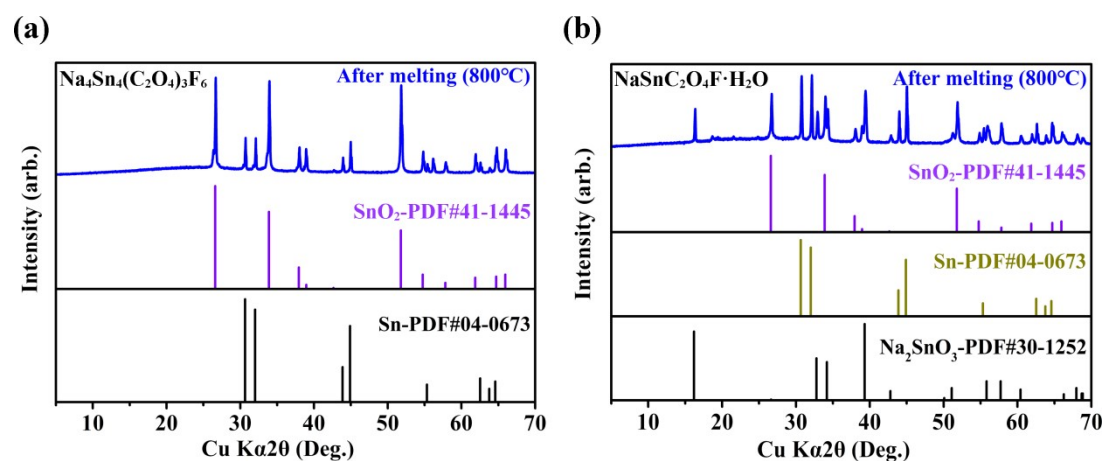

**Fig. S3** XRD patterns for compounds (a)  $\text{Na}_4\text{Sn}_4(\text{C}_2\text{O}_4)_3\text{F}_6$  and (b)  $\text{NaSnC}_2\text{O}_4\text{F}\cdot\text{H}_2\text{O}$  after melting.

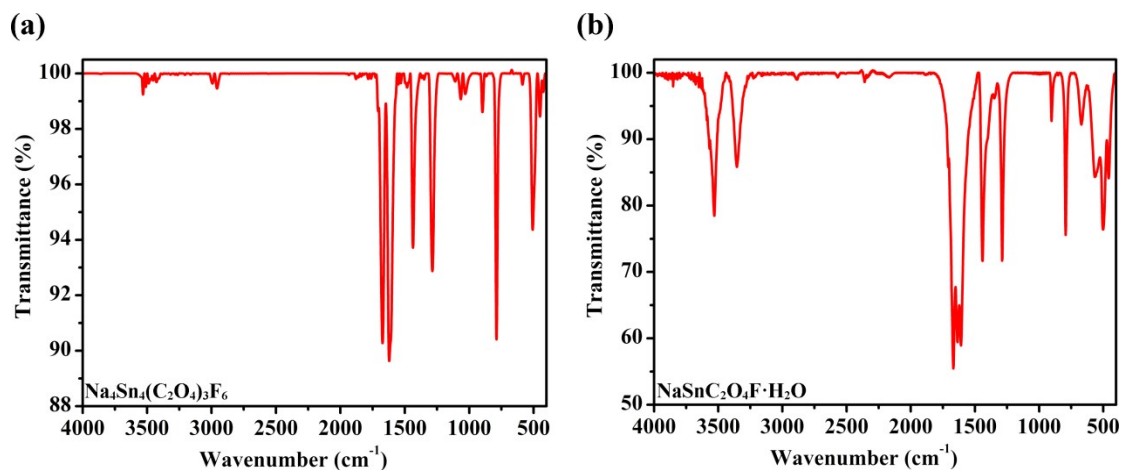

Fig. S4 IR spectra of (a)  $\text{Na}_4\text{Sn}_4(\text{C}_2\text{O}_4)_3\text{F}_6$  and (b)  $\text{NaSnC}_2\text{O}_4\text{F}\cdot\text{H}_2\text{O}$ .

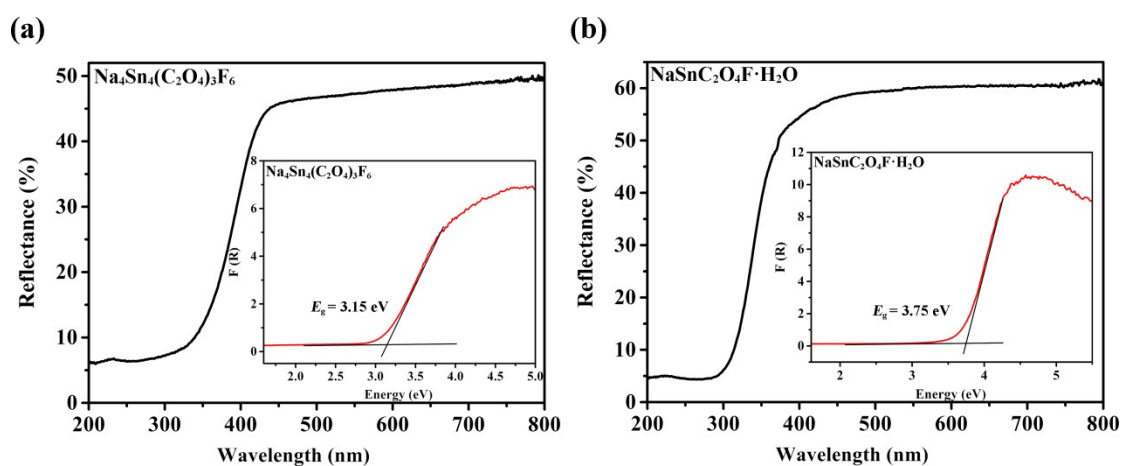

Fig. S5 The UV-vis-NIR diffuse reflectance spectra and band gaps of (a)  $\text{Na}_4\text{Sn}_4(\text{C}_2\text{O}_4)_3\text{F}_6$  and (b)  $\text{NaSnC}_2\text{O}_4\text{F}\cdot\text{H}_2\text{O}$ .

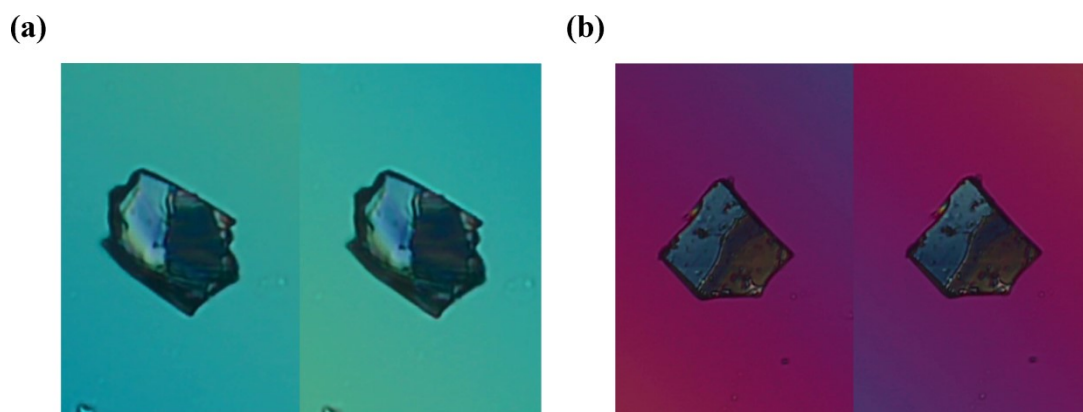

Fig. S6 Birefringence measurement photos of (a)  $\text{Na}_4\text{Sn}_4(\text{C}_2\text{O}_4)_3\text{F}_6$  and (b)  $\text{NaSnC}_2\text{O}_4\text{F}\cdot\text{H}_2\text{O}$ .



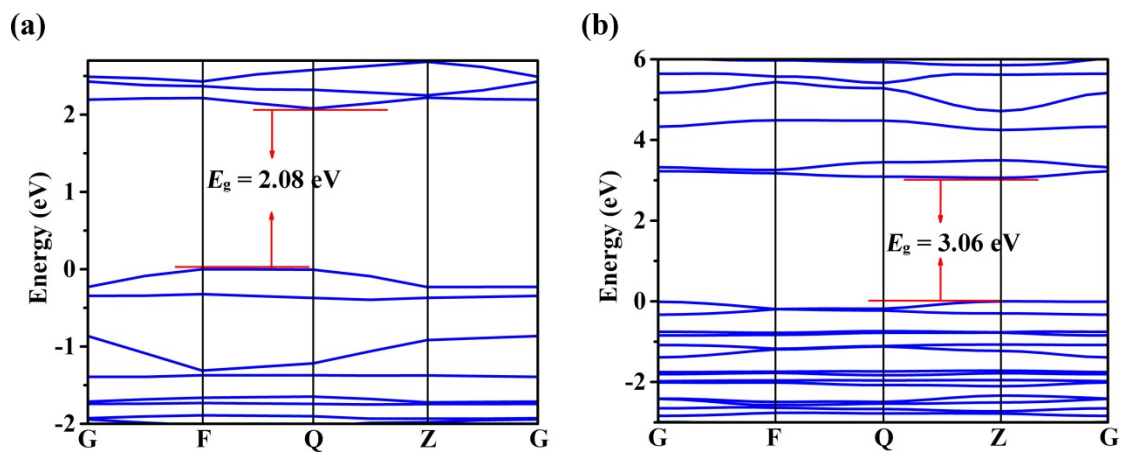

**Fig. S7** Calculated band gaps of (a)  $\text{Na}_4\text{Sn}_4(\text{C}_2\text{O}_4)_3\text{F}_6$  and (b)  $\text{NaSnC}_2\text{O}_4\text{F}\cdot\text{H}_2\text{O}$ .
